# Supplementary material
Source: Springer Nature journal article supplement (https://www.springerprofessional.de/resource/supplementary/13638_2011_314_MOESM4_ESM.pdf/11897560)
Supplement: MOESM4 [file 11897560]

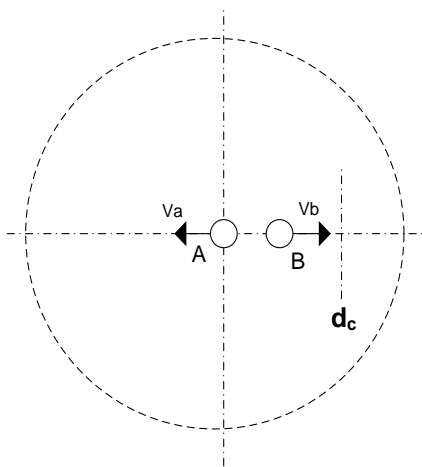

Case 5: Nodes moving away  
 $|V_a| - |V_b| \gg V_l$  or  $|V_b| - |V_a| \gg V_l$

$$d_{ab} < d_c$$

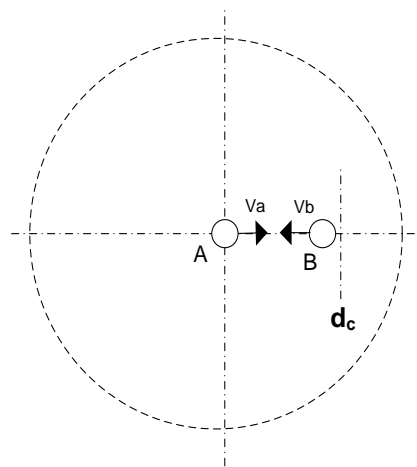

Case 6: Nodes moving toward  
 $|V_a| - |V_b| \gg V_l$  or  $|V_b| - |V_a| \gg V_l$

$$d_{ab} < d_c$$

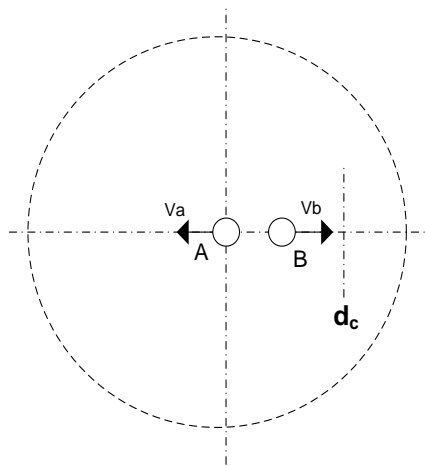

Case 7: Nodes moving away  
 $|V_a| - |V_b| < V_l$  or  $|V_b| - |V_a| < V_l$

$$d_{ab} < d_c$$

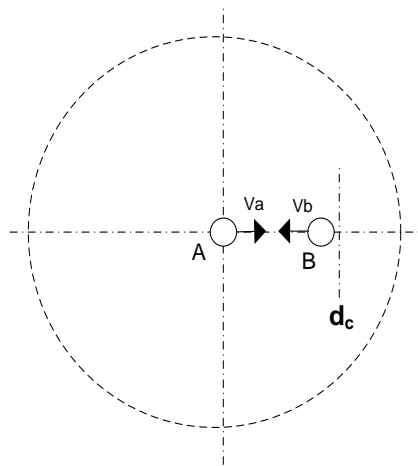

Case 8: Nodes moving toward  
 $|V_a| - |V_b| < V_l$  or  $|V_b| - |V_a| < V_l$

$$d_{ab} < d_c$$
